# Supplementary figures and images for: Subcutaneous Adipocyte Lipolysis Contributes to Circulating Lipid Levels
Source: PubMed Central journal article supplement — Arterioscler Thromb Vasc Biol. 2017 Aug 23;37(9):1782–7. doi: 10.1161/ATVBAHA.117.309759 (PMC5567402; doi:10.1161/atvbaha.117.309759), 2017-08-23

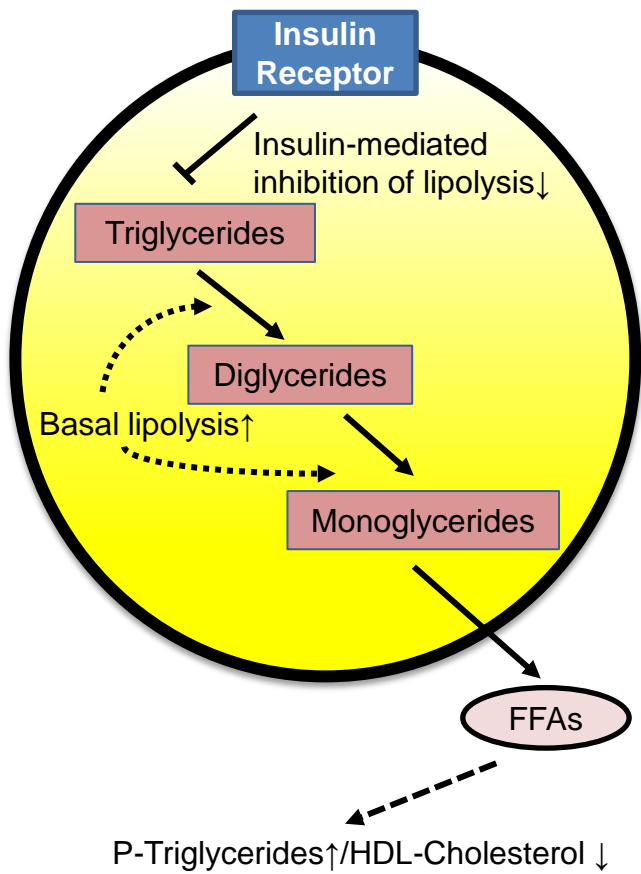

Supplement: atv-37-1782-s001.pdf [file atv-37-1782-s001.pdf]
